# Supplementary material
Source: PubMed Central journal article supplement (PMC4868625)
Supplement: NIHMS764388-supplement-1.pdf [file NIHMS764388-supplement-1.pdf]

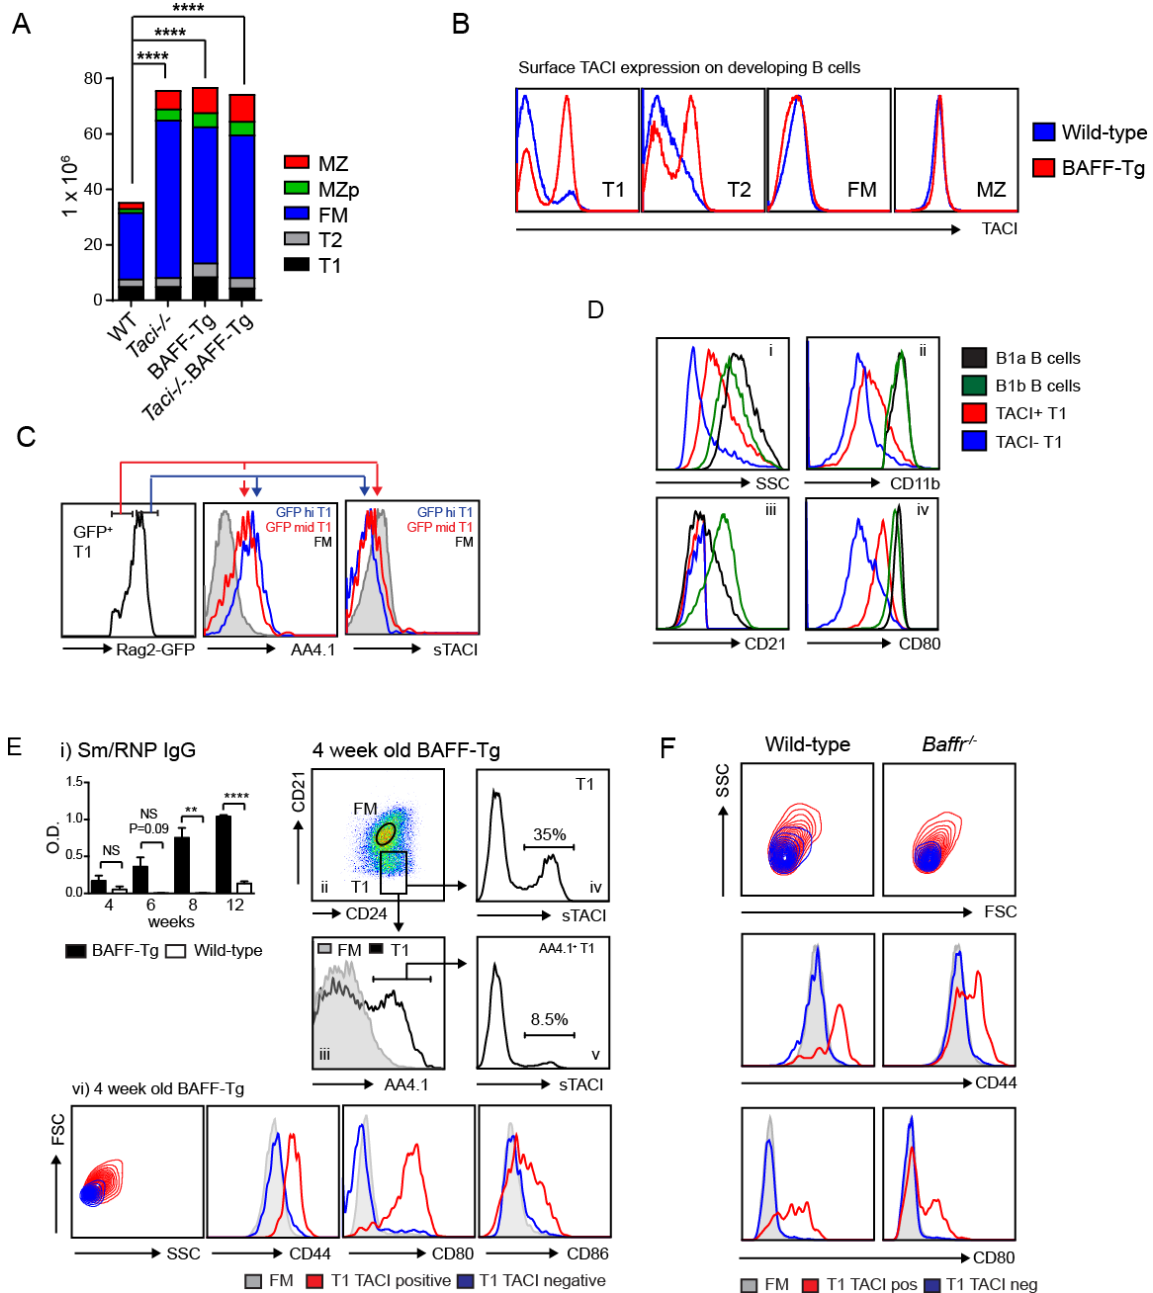

**Supplemental Figure 1: The TACI<sup>+</sup> transitional subset in BAFF-Tg mice are derived from transitional B cells**

(A) Total splenic B cells and B cell developmental subsets in WT, *Tac1*<sup>-/-</sup>, BAFF-Tg and *Tac1*<sup>-/-</sup>.BAFF-Tg mice. \*\*\*\*, P<0.0001, by one-way ANOVA, followed by Tukey's multiple comparison test. (B) sTACI on splenic B cell subsets from wild-type (blue) and BAFF-Tg (red) mice. (C) AA4.1 is downregulated on a subset of recent BM emigrant T1 B cells. GFP<sup>hi</sup> T1 B cells from Rag2-GFP<sup>+</sup> mouse were subdivided into GFP<sup>hi</sup> and GFP<sup>mid</sup> subsets (such that GFP<sup>mid</sup> T1 B cells have undergone ~50% GFP dilution). Left panel: Rag2-GFP expression (gated on GFP<sup>+</sup> T1 B cells) showing GFP<sup>mid</sup> and GFP<sup>hi</sup> gating strategy. Overlaid histograms showing AA4.1 (middle panel) and sTACI (right panel) expression in Rag2-GFP<sup>mid</sup> T1 (red), Rag2-GFP<sup>hi</sup> T1 (blue) and FM (grey) B cells. Notably, AA4.1 staining was lower and sTACI expression higher on GFP<sup>mid</sup> T1 relative to GFP<sup>hi</sup> T1 B cells, consistent with reciprocal regulation of AA4.1 and sTACI within the transitional compartment. (D) TACI<sup>+</sup> T1 B cells from BAFF-Tg mice are not peritoneal B1 B cells. (i-iv) Overlaid histograms showing surface phenotype of BAFF-Tg TACI<sup>hi</sup> (red) and TACI<sup>lo</sup> (blue) T1 B cells compared with BAFF-Tg peritoneal B1a (black) and B1b (green) B cells. (i) While TACI<sup>hi</sup> T1 are larger than TACI<sup>lo</sup> T1, the TACI<sup>hi</sup> subset is smaller than both B1a and B1b B cells. (ii) T1 B cells lack surface expression of CD11b, a marker of peritoneal B1 B cells (1). (iii) CD21 expression is higher on B1b cells (hypothesized to contribute to BAFF-Tg autoimmunity (2)) relative to BAFF-Tg TACI<sup>hi</sup> and TACI<sup>lo</sup> T1 B cells. (iv) Although CD80 is upregulated on activated TACI<sup>hi</sup> T1 B cells from BAFF-Tg mice, surface CD80 expression is significantly higher on peritoneal B1 B cells. (i-iv) Peritoneal B1 cells were gated as CD19<sup>hi</sup> IgM<sup>hi</sup> CD11b(Mac-1)<sup>+</sup> and further subdivided as CD5<sup>pos</sup> B1a and CD5<sup>neg</sup> B1b. (E) BAFF-Tg TACI<sup>+</sup> T1 B cells develop prior to systemic autoimmunity. (i) Serum anti-Sm/RNP IgG autoantibodies in WT (white) and BAFF-Tg (black) mice at indicated ages. Error bars, SEM; \*\*, P<0.01; \*\*\*\*, P<0.0001, by two-tailed Student's t-test. (ii) T1 and FM gates in 4-week-old BAFF-Tg mouse. (iii) AA4.1 expression on BAFF-Tg FM and T1 B cells; gate indicates AA4.1<sup>+</sup> cells. (iv, v) Representative histograms of sTACI expression on BAFF-Tg CD21<sup>lo</sup>CD24<sup>hi</sup> T1 B cells (iv); as well as AA4.1<sup>+</sup> T1 B cells (v). Number indicates % within gate. Although AA4.1 expression was decreased on T1 B cells from young BAFF-Tg mice, we still noted a distinct subpopulation of TACI<sup>+</sup> B cells when gated on AA4.1<sup>+</sup> T1 B cells (in keeping with a transitional origin for this novel subset). (vi) Cell size (by forward (FSC) and side (SSC) scatter); and surface activation markers in BAFF-Tg FM (grey), TACI<sup>lo</sup> (blue) and TACI<sup>hi</sup> (red) T1 B cells demonstrating identical surface phenotype of TACI<sup>+</sup> T1 B cells in BAFF-Tg mice prior to the onset of autoimmunity. (F) TACI<sup>+</sup> T1 B cells from WT and *Baffr*<sup>-/-</sup> mice exhibit activated surface phenotype. Cell size (by forward (FSC) and side (SSC) scatter; upper); and representative histograms of CD44 (middle), CD80 (lower) in WT (left) and *Baffr*<sup>-/-</sup> (right) TACI<sup>hi</sup> T1 (red), *Baffr*<sup>-/-</sup> TACI<sup>lo</sup> T1 (blue) and WT FM (grey) B cells.

## A Nucleotide substitution pattern in mutated GFP<sup>lo</sup> clones

|      |   | To  |     |     |      |
|------|---|-----|-----|-----|------|
|      |   | A   | C   | G   | T    |
| From | A |     | 4.9 | 12  | 7.3  |
|      | C | 1.2 |     | 1.2 | 19.5 |
|      | G | 34  | 9.8 |     | 6.1  |
|      | T | 2.4 | 1.2 | 0.0 |      |

## B Location of heavy chain mutations

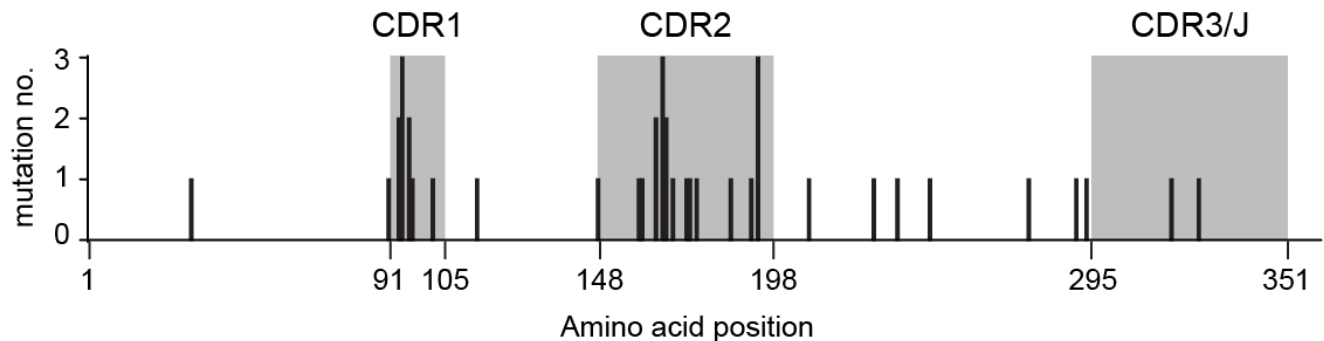

**Supplemental Figure 2: Immunoglobulin mutations in cycling BAFF-Tg transitional cells exhibit characteristics of AID-mediated somatic hypermutation (SHM).** (A) Summary of nucleotide substitution patterns in mutated sequences from cloned GFP<sup>lo</sup> BCRs sorted from Rag2-GFP.BAFF-Tg mice (numbers indicate percentage of each specific type of substitution among cloned BCRs exhibiting evidence for SHM), demonstrating bias for G to A and C to T transitions (3). (B) Location of heavy chain mutations in cloned GFP<sup>lo</sup> BCRs from sorted T1/T2 Rag2-GFP.BAFF-Tg transitional B cells. Mutations are targeted to complementary determining regions (CDR1-2), consistent with AID-dependent somatic hypermutation (4). CDRs shaded in grey.

### Supplemental References:

1. Ghosn, E.E., Y. Yang, J. Tung, L.A. Herzenberg, and L.A. Herzenberg. 2008. CD11b expression distinguishes sequential stages of peritoneal B-1 development. *Proc Natl Acad Sci U S A* 105:5195-5200.
2. Fairfax, K.A., E. Tsantikos, W.A. Figgett, F.B. Vincent, P.S. Quah, M. LePage, M.L. Hibbs, and F. Mackay. 2015. BAFF-driven autoimmunity requires CD19 expression. *J Autoimmun* 62:1-10.
3. Rada, C., G.T. Williams, H. Nilsen, D.E. Barnes, T. Lindahl, and M.S. Neuberger. 2002. Immunoglobulin isotype switching is inhibited and somatic hypermutation perturbed in UNG-deficient mice. *Curr Biol* 12:1748-1755.
4. Jolly, C.J., S.D. Wagner, C. Rada, N. Klix, C. Milstein, and M.S. Neuberger. 1996. The targeting of somatic hypermutation. *Semin Immunol* 8:159-168.
